# Supplementary material for: Insight Into Metabolic Versatility of an Aromatic Compounds-Degrading Arthrobacter sp. YC-RL1
Source: PubMed Central journal article supplement (PMC6193132; doi:10.3389/fmicb.2018.02438), 2018-10-11
Supplement: Presentation_1.pdf [file Presentation_1.pdf]

## Supplementary materials

### **Insight into Metabolic Versatility of an Aromatic Compounds-Degrading *Arthrobacter* sp. YC-RL1**

*Lei Ren<sup>1,2</sup>, Yang Jia<sup>2</sup>, , Rui Zhang<sup>1, 3</sup>, Zhong Lin<sup>1, 4</sup>, Zhen Zhen<sup>1</sup>, Hanqiao Hu<sup>1</sup>,  
Yanchun Yan<sup>2</sup>,*

*1. Agricultural College, Guangdong Ocean University, Zhanjiang 524088, China;*

*2. Graduate School of Chinese Academy of Agricultural Sciences, Beijing 100081, China;*

*3. Shenzhen Research Institute of Guangdong Ocean University, Shenzhen 518000, China;*

*4. Faculty of Chemistry and Environmental Science, Guangdong Ocean University, Zhanjiang 524088, China.*

Address correspondence to: Yanchun Yan, Graduate School of Chinese Academy of Chinese Agricultural Sciences, Beijing, 100081, PR China. Tel: +86 10 82109685; Fax: +86 10 82106609; E-mail: yanyanchun2012@qq.cn.

Table S1| Typical *Arthrobacter* strains involved in xenobiotics degradation

| Strains                                      | Substrates                        |                           | Genome availability<br>(GenBank acc. no.) | References              |
|----------------------------------------------|-----------------------------------|---------------------------|-------------------------------------------|-------------------------|
|                                              | Substrates                        | Substrate type            |                                           |                         |
| <i>Arthrobacter</i> sp. IF1                  | 4-Fluorophenol                    |                           | -                                         | Ferreira et al., 2009   |
| <i>Arthrobacter</i> sp. JS443                | <i>p</i> -Nitrophenol             |                           | -                                         | Perry and Zylstra, 2007 |
| <i>Arthrobacter chlorophenolicus</i> A6      | 4-Chlorophenol                    |                           | + (NC_011886)                             | Nordin et al., 2005     |
| <i>Arthrobacter</i> sp. W1                   | Phenols                           | Benzenoids and            | +JWMD01000000                             | Wang et al., 2009       |
| <i>Arthrobacter</i> sp. SPG                  | 2-Nitrobenzoate                   | their derivatives         | -                                         | Arora and Sharma, 2015  |
| <i>Arthrobacter</i> sp. PJ3                  | Biphenyl                          |                           | -                                         | Yang et al., 2007       |
| <i>Arthrobacter phenanthrenivorans</i> Sphe3 | Phenanthrene                      |                           | + (NC_015145)                             | Vandera et al., 2015    |
| <i>Arthrobacter oxydans</i> B4               | Benzo[ $\alpha$ ]pyrene           |                           | -                                         | Peng et al., 2012       |
| <i>Arthrobacter aurescens</i> M2012083       | Nicotine                          | Heterocyclic<br>compounds | + (AKKK00000000)                          | Yao et al., 2015        |
| <i>Arthrobacter aurescens</i> TC1            | <i>s</i> -Triazine ring compounds |                           | + (NC_008711)                             | Strong et al., 2002     |
| <i>Arthrobacter</i> sp. TES6                 | Atrazine                          |                           | -                                         | Sebaï et al., 2011      |
| <i>Arthrobacter</i> sp. SPG23                | Diesel                            | Hydrocarbons              | + JYCN01000000                            | Romero et al., 2017     |
| <i>Arthrobacter</i> sp. DSM312               | Pentane                           |                           | -                                         | Ionata et al., 2005     |

Table S2 | Bacterial strains, plasmids and primers

| Items                                | Relevant characteristics                                                                                                                                                                                                                 | References      |
|--------------------------------------|------------------------------------------------------------------------------------------------------------------------------------------------------------------------------------------------------------------------------------------|-----------------|
| <b>Strains</b>                       |                                                                                                                                                                                                                                          |                 |
| <i>Arthrobacter</i> sp. YC-RL1       | CGMCC NO.10611                                                                                                                                                                                                                           | Ren et al, 2016 |
| <i>Escherichia coli</i> DH5 $\alpha$ | F <sup>-</sup> , $\phi$ 80, <i>lacZ</i> $\Delta$ M15, $\Delta$ ( <i>lacZYA-argF</i> ) U169 <i>endA1</i> , <i>recA1</i> , <i>hsdR17</i> (rk-, mk+) <i>supE44</i> , $\lambda$ -, <i>thi-1</i> , <i>gyrA96</i> , <i>relA1</i> , <i>phoA</i> | Promega         |
| <i>Escherichia coli</i> BL21 (DE3)   | F <sup>-</sup> , <i>ompT</i> , <i>hsdSB</i> (rB <sup>-</sup> mB <sup>-</sup> ), <i>gal</i> , <i>dcm</i> (DE3)                                                                                                                            | Promega         |
| <b>Plasmids</b>                      |                                                                                                                                                                                                                                          |                 |
| pMD19T                               | Cloning of target gene                                                                                                                                                                                                                   | TaKaRa          |
| pET32a                               | Expression of target gene                                                                                                                                                                                                                | Novagen         |
| <b>Primers</b>                       |                                                                                                                                                                                                                                          |                 |
| <i>bphC</i> -F                       | GCGCGGATCCATGACTCACATCCGTGGACTT                                                                                                                                                                                                          | <i>BamH I</i> * |
| <i>bphC</i> -R                       | GCGCCTCGAGGTTTGCCGCGGCGAC                                                                                                                                                                                                                | <i>Xho I</i> *  |

\*: The designed restriction site (the underline base pairs) in each primer.

Table S3 The detail information of chemicals involved in this study

| Chemicals             | CAS No.  | Provider                                                        | Purity                    |
|-----------------------|----------|-----------------------------------------------------------------|---------------------------|
| <i>p</i> -Nitrophenol | 100-02-7 | Sinopharm Chemical Reagent Beijing Co., Ltd (Beijing, China)    | Analytical grade (99.2%)  |
| Naphthalene           | 91-20-3  | Shanghai Aladdin Bio-Chem Technology Co., Ltd (Shanghai, China) | Analytical grade (>97.0%) |
| Phenanthrene          | 85-01-8  | Shanghai Aladdin Bio-Chem Technology Co., Ltd (Shanghai, China) | Analytical grade (>97.0%) |
| Biphenyl              | 92-52-4  | J&K Scientific Ltd (Beijing, China)                             | Analytical grade (99.5%)  |
| Bisphenol A           | 80-05-7  | J&K Scientific Ltd (Beijing, China)                             | Analytical grade (99.0%)  |
| <i>p</i> -Xylene      | 106-42-3 | Fisher Scientific                                               | HPLC grade (99.9%)        |
| Methanol              | 67-56-1  | Fisher Scientific                                               | HPLC grade (99.9%)        |
| Acetonitrile          | 75-05-8  | Fisher Scientific                                               | HPLC grade (99.9%)        |
| Salicylic acid        | 69-72-7  | Sinopharm Chemical Reagent Beijing Co., Ltd (Beijing, China)    | Analytical grade (99.3%)  |
| Gentisic acid         | 490-79-9 | J&K Scientific Ltd (Beijing, China)                             | Analytical grade (99.0%)  |
| Benzoate              | 65-85-0  | Sinopharm Chemical Reagent Beijing Co., Ltd (Beijing, China)    | Analytical grade (99.0%)  |
| Protocatechuate       | 95-50-3  | J&K Scientific Ltd (Beijing, China)                             | Analytical grade (99.0%)  |
| DEHP*                 | 75-09-2  | Sinopharm Chemical Reagent Beijing Co., Ltd (Beijing, China)    | Analytical grade (99.0%)  |
| Dichloromethane       | 141-78-6 | Sinopharm Chemical Reagent Beijing Co., Ltd (Beijing, China)    | Analytical grade (99.5%)  |

DEHP\*: di 2-ethyl hexyl phthalate

Table S4 | Genomic features of the six subject *Arthrobacter* strains

| Genomic features                      | <i>Arthrobacter</i> strain |             |             |             |             |             |
|---------------------------------------|----------------------------|-------------|-------------|-------------|-------------|-------------|
|                                       | YC-RL1                     | A6          | FB24        | Sphe3       | TC1         | RE117       |
| Genome size (bp)                      | 4,018,639                  | 4,980,870   | 5,070,478   | 4,535,320   | 5,226,648   | 3,918,192   |
| G+C content (mol %)                   | 64.0                       | 66.0        | 65.4        | 65.4        | 62.4        | 59.3        |
| Accession number                      | NZ_CP013297.1              | NC_011886.1 | NC_008541.1 | NC_015145.1 | NC_008712.1 | NC_014550.1 |
| Protein coding genes                  | 3,720                      | 4,590       | 4,523       | 4,131       | 4,523       | 3,436       |
| No. of genes with function prediction | 3,579                      | 3,095       | 3,256       | 2,922       | 3,256       | 2,378       |
| No. of tRNAs                          | 67                         | 88          | 51          | 50          | 51          | 64          |
| No. of rRNAs                          | 19                         | 15          | 15          | 12          | 15          | 18          |

Table S5 | Ring-cleavage related dioxygenases identified in strain YC-RL1

| Location   | Accession number | Gene annotation                             |
|------------|------------------|---------------------------------------------|
| Chromosome | WP_047118329     | Catechol 2,3-dioxygenase                    |
| Chromosome | WP_047120477     | 2,3-dihydroxybiphenyl 1,2-dioxygenase       |
| Chromosome | WP_047118329     | Tryptophan 2,3-dioxygenase                  |
| Chromosome | WP_047118013     | Protocatechuate 3,4-dioxygenase beta chain  |
| Chromosome | WP_047118014     | Protocatechuate 3,4-dioxygenase alpha chain |
| Plasmid02  | WP_060617062     | Hydroxyquinol 1,2-dioxygenase               |
| Chromosome | WP_047120102     | 4-hydroxyphenylpyruvate dioxygenase         |
| Chromosome | WP_047120099     | 3,4-dioxygenase subunit beta                |

Dioxygenases involved in the ring-cleavage were marked with gray background.

(I) Metabolic intermediates of BP at 24 h

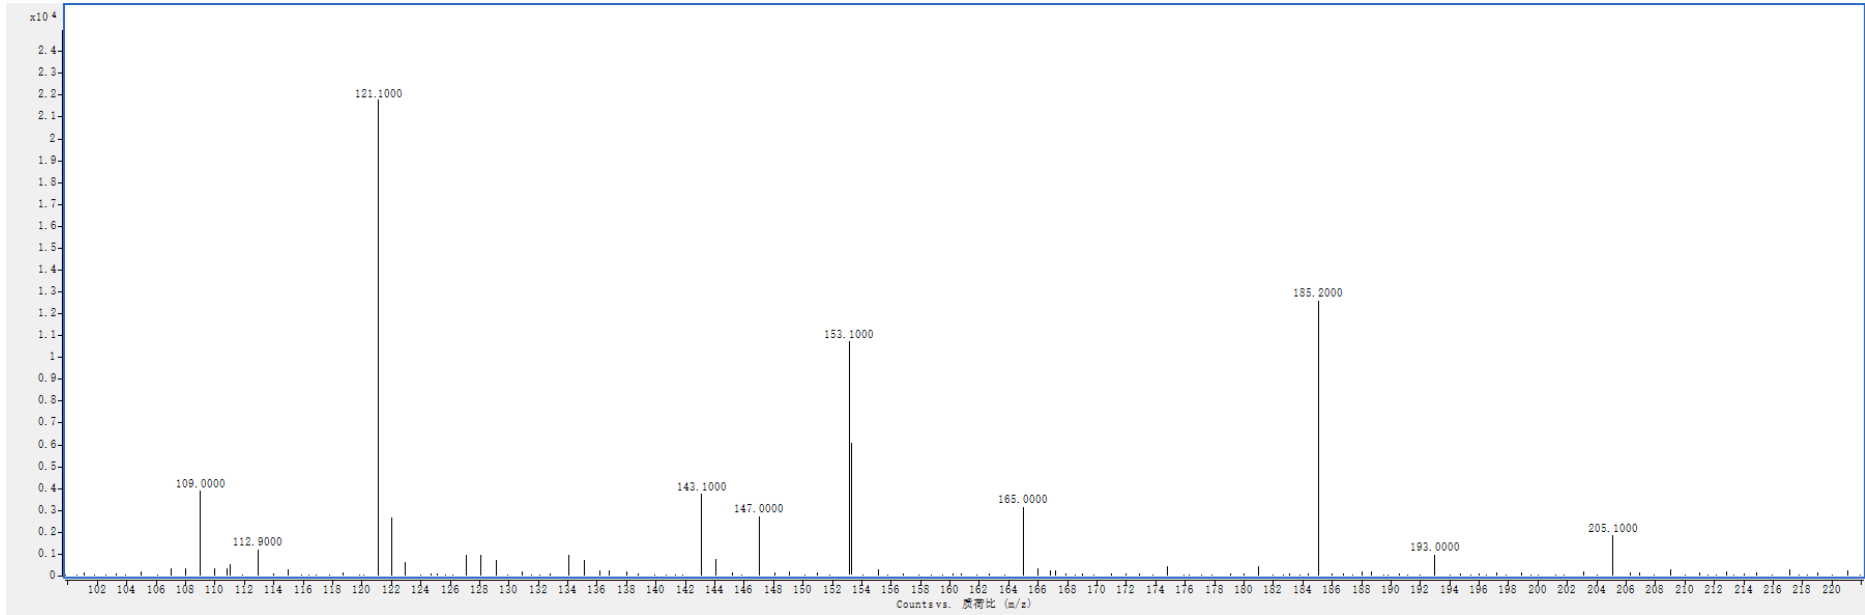

(II) Metabolic intermediates of Bisphenol A at 36 h

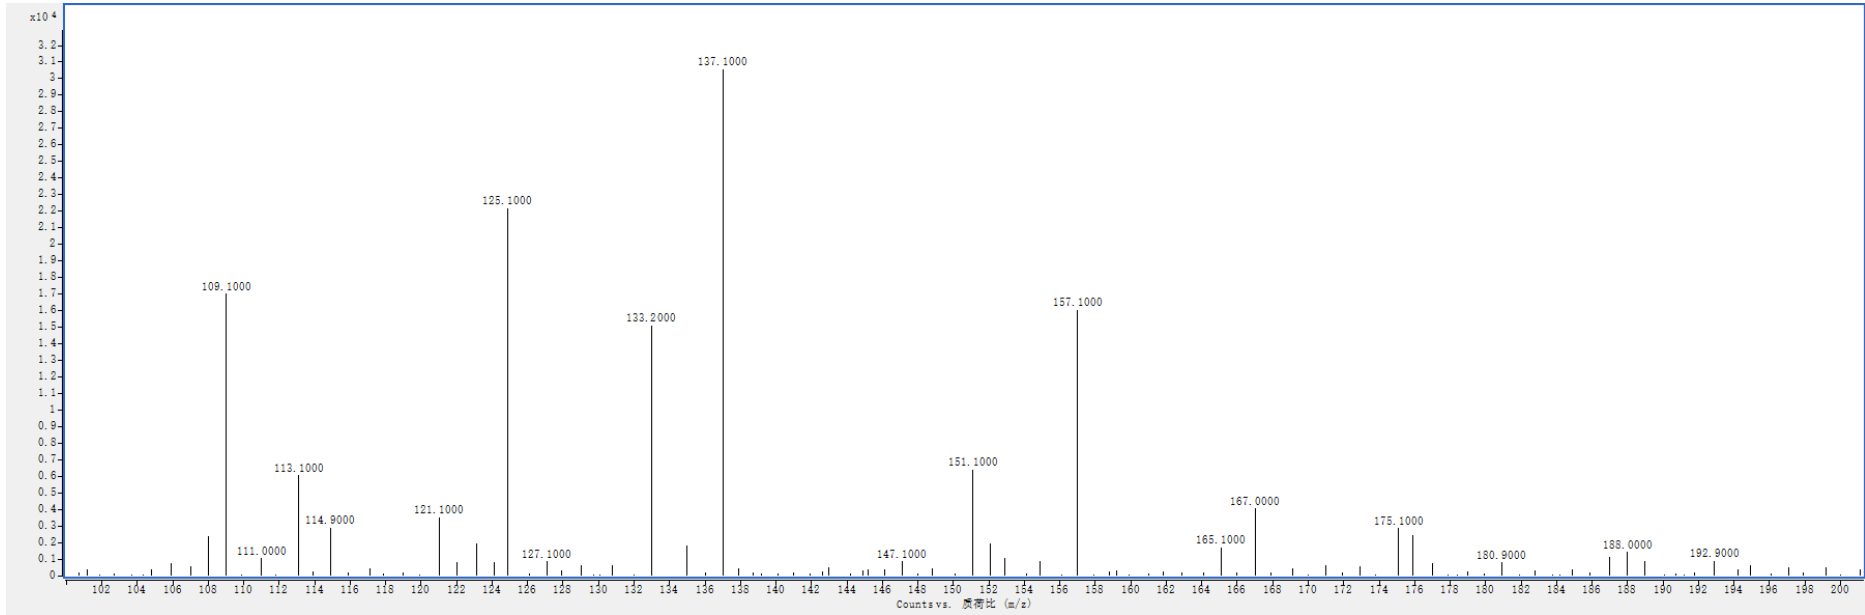



(III) Metabolic intermediates of naphthalene at 36 h

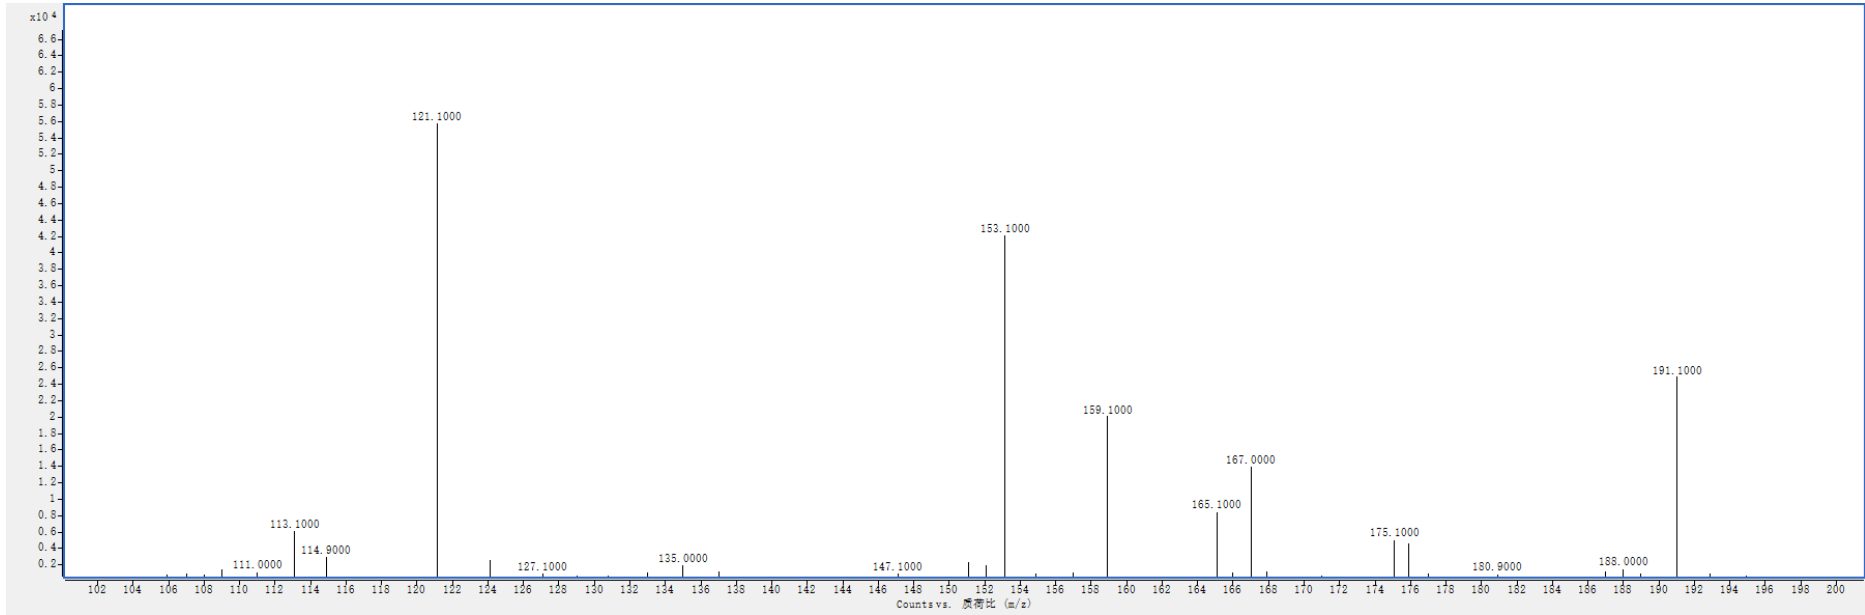

(IV) Metabolic intermediates of *p*-nitrophenol at 24h

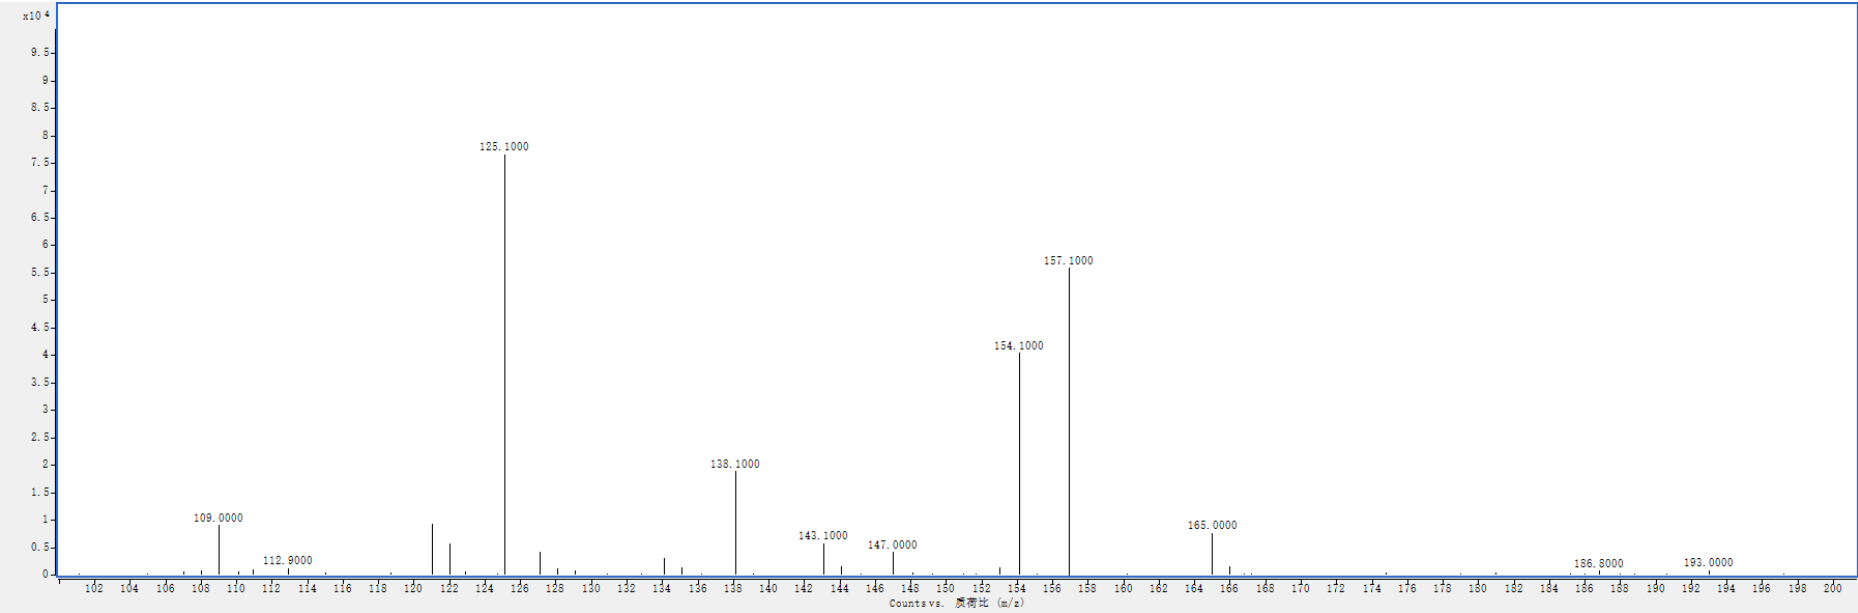

(V)HPLC analysis of benzoate, protocatechuate, salicylaldehyde and gentisic acid (standard chemicals)

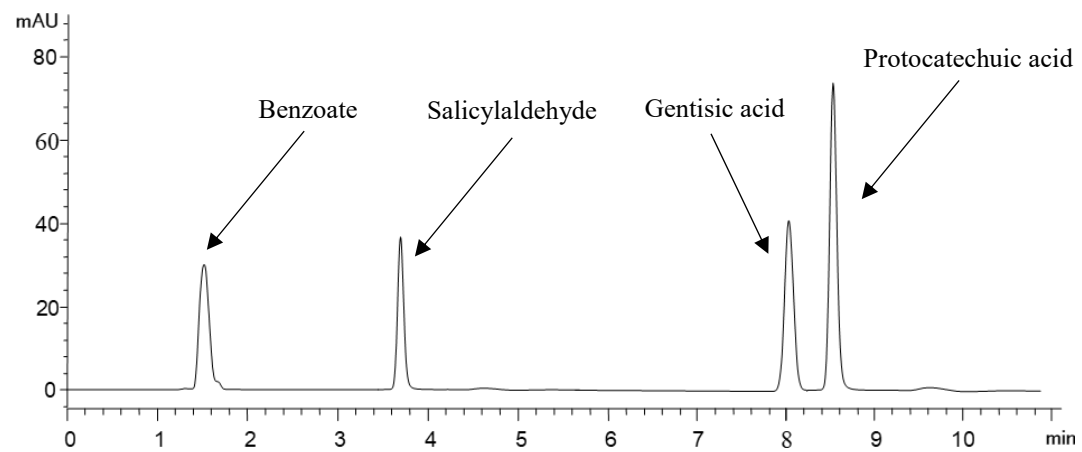

(VI) HPLC analysis of biphenyl metabolic intermediates

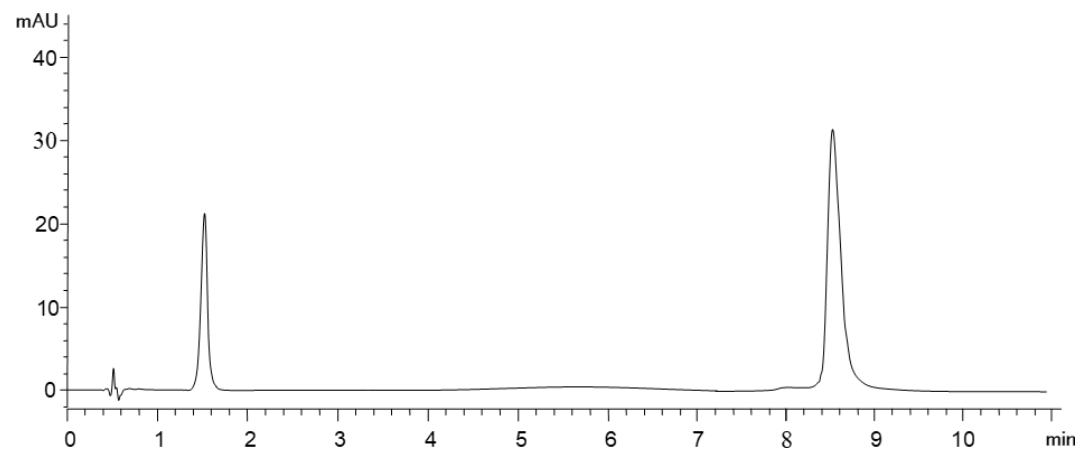

(VII) HPLC analysis of naphthalene metabolic intermediates

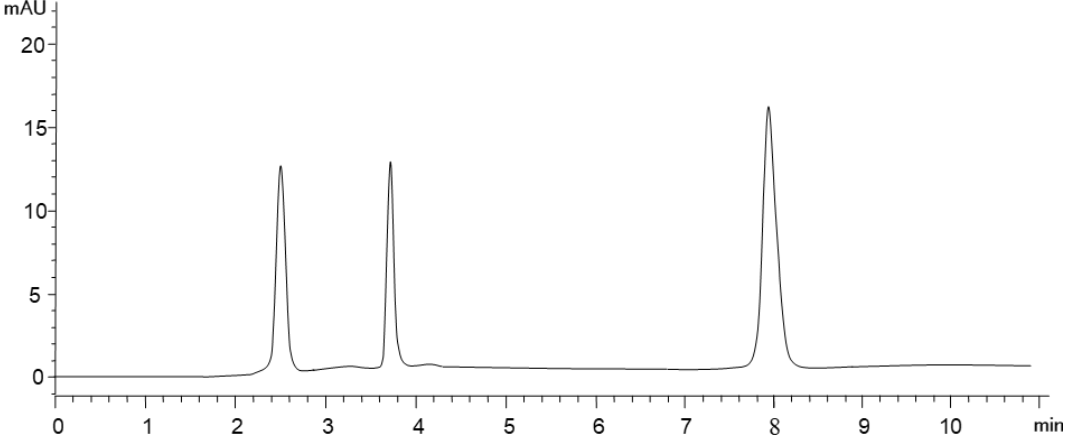

FIGURE S1 | Detection of metabolic intermediates by HPLC and HPLC-MS

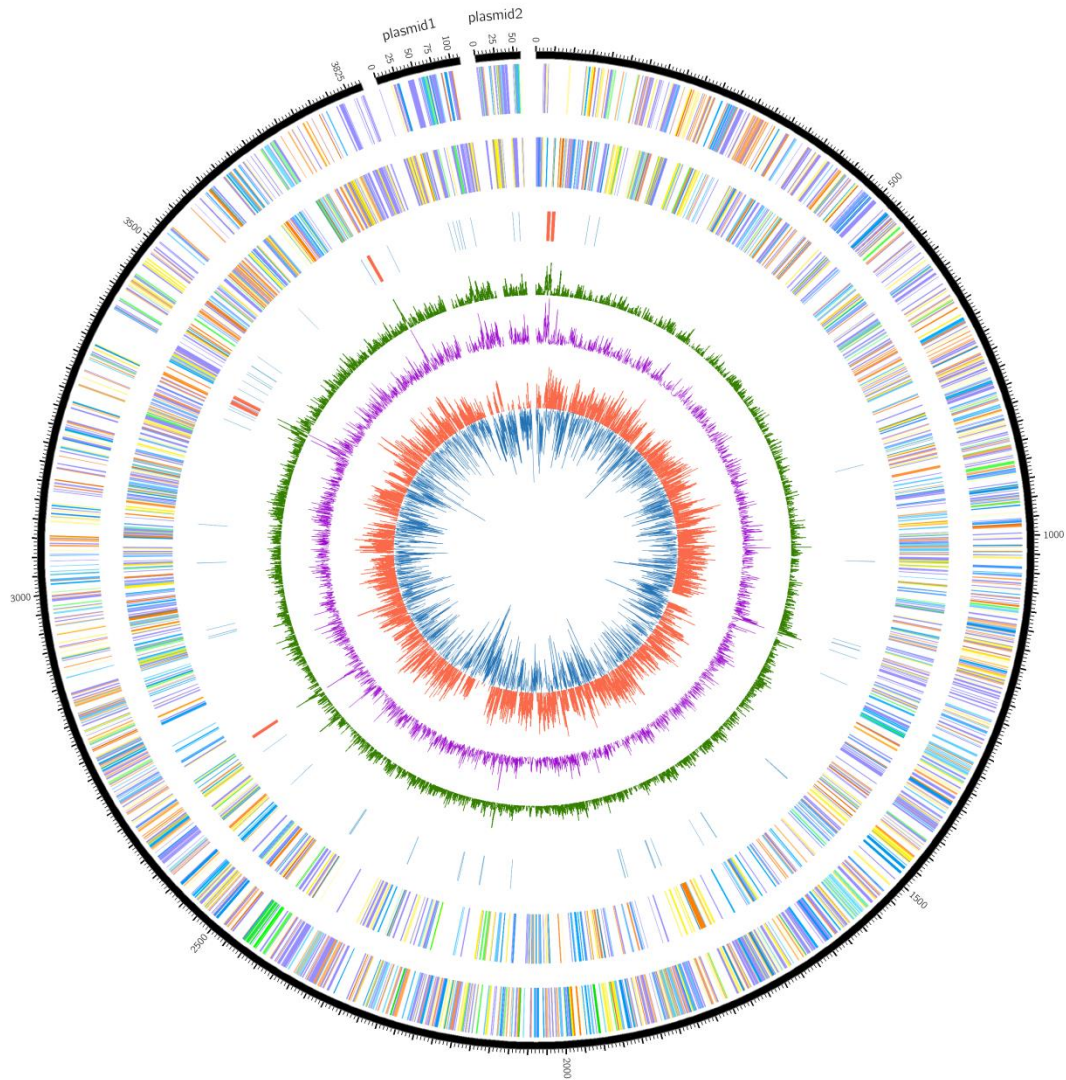

FIGURE S2 | Circular representations of strain YC-RL1 chromosome and plasmids displaying relevant genome features. From the outer to the inner concentric circle: circle 1 (outermost circle) represents the scale; circles 2 and 3, the predicted protein-coding sequences (CDS) on the forward (outer wheel) and the reverse (inner wheel) strands colored according to the assigned COG classes; circle 4 includes tRNA (blue) and rRNA (red) positions; circles 5 and 6 represent the GC skew (-) and skew (+) respectively; circles 7 and 8, G+C content showing deviations from the average (red mean higher than the average, blue means lower than the average). The bar of color indicates the COG function groups: C, energy production and conversion; D, cell cycle control, mitosis and meiosis; E, amino acid transport and metabolism; F, nucleotide transport and metabolism; G, carbohydrate transport and metabolism; H, coenzyme transport and metabolism; I, lipid transport and metabolism; J, translation; K, transcription; L, replication, recombination and repair; M, cell wall/membrane biogenesis; N, cell motility; O, post-translational modification, protein turnover, chaperones; P, inorganic ion transport and metabolism; Q, secondary metabolites biosynthesis, transport and catabolism; R, general function prediction only; S, function unknown; T, signal transduction mechanisms; U, intracellular trafficking and secretion; V, defense mechanisms.

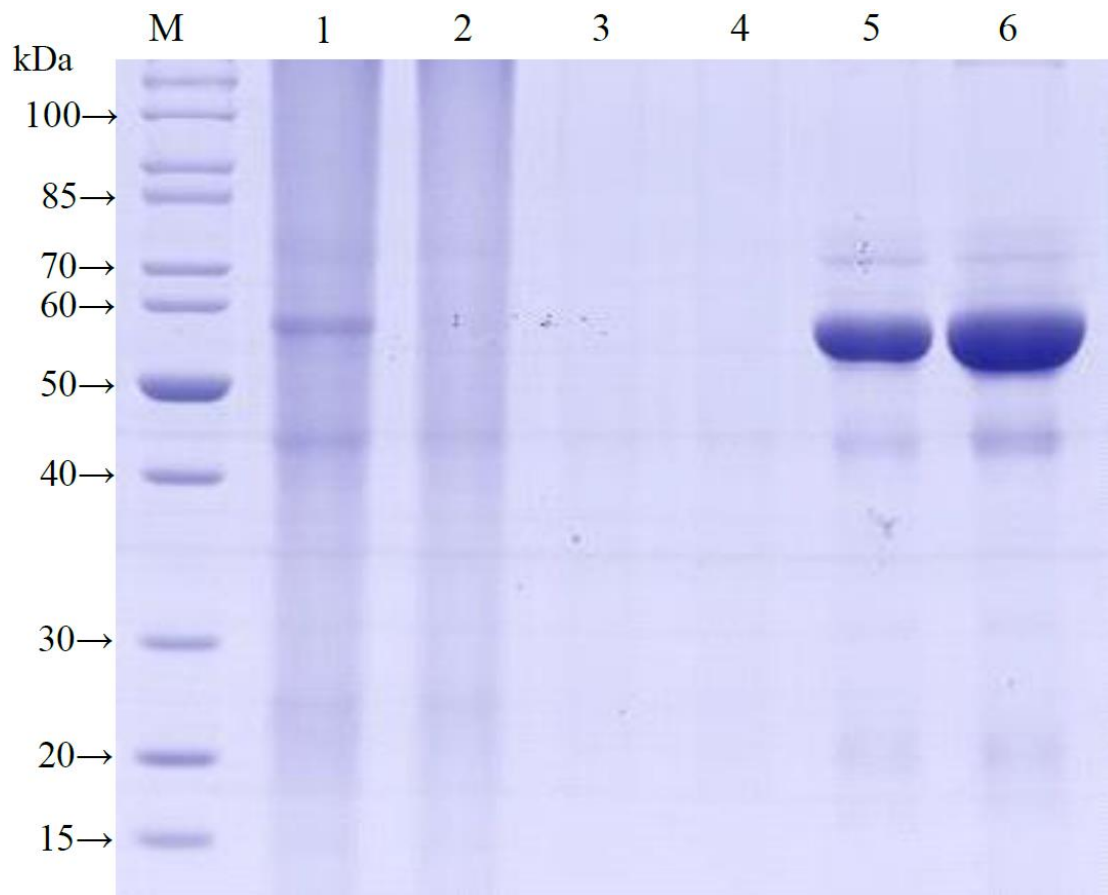

FIGURE S3| SDS-PAGE analysis of the purified BphC

(M = Protein maker, 1 = Induced E. coli BL21 cells with recombinant plasmid, 2 = Induced E. coli BL21 cells without recombinant plasmid; 3 = Purification of induced E. coli BL21 cells without recombinant plasmid, 4 = Purification of induced E. coli BL21 cells with pET32a(+) plasmid only, 5 and 6 = Purified BphC.)

## References

- Arora, P. K., and Sharma, A. (2015). New metabolic pathway for degradation of 2-nitrobenzoate by *Arthrobacter* sp. SPG. *Front. Microbiol.* 6:551. doi:10.3389/fmicb.2015.00551
- Ferreira, M. I. M., Iida, T., Hasan, S. A., Nakamura, K., Fraaije, M. W., Janssen, D. B., and Kudo, T. (2009). Analysis of two gene clusters involved in the degradation of 4-fluorophenol by *Arthrobacter* sp. strain IF1. *Appl. Environ. Microbiol.* 75, 7767-7773. doi: 10.1128/AEM.00171-09
- Ionata, E., Blasio, P., and Cara, F. (2005). Microbiological degradation of pentane by immobilized cells of *Arthrobacter* sp. *Biodegradation* 16, 1-9. doi: 10.1007/s10531-004-0473-x
- Nordin, K., Unell, M., and Jansson, J. K. (2005). Novel 4-chlorophenol degradation gene cluster and degradation route via hydroxyquinol in *Arthrobacter chlorophenolicus* A6. *Appl. Environ. Microbiol.* 71, 6538-6544. doi: 10.1128/AEM.71.11.6538-6544.2005
- Peng, H., Yin, H., Deng, J., Ye, J. S., Chen, S. N., He, B. Y., and Zhang, N. (2012). Biodegradation of benzo[ $\alpha$ ]pyrene by *Arthrobacter oxydans* B4. *Pedosphere* 22, 554-561. doi: 10.1016/S1002-0160(12)60040-X
- Perry, L. L., and Zylstra, G. J. (2007). Cloning of a gene cluster involved in the catabolism of *p*-nitrophenol by *Arthrobacter* sp. strain JS443 and characterization of the *p*-nitrophenol monooxygenase. *J. Bacteriol.* 189, 7563-7572. doi: 10.1128/JB.01849-06
- Ren, L., Jia, Y., Ruth, N., Zhao, B., and Yan, Y. (2016). Complete genome sequence of an aromatic compound degrader *Arthrobacter* sp. YC-RL1. *J. Biotechnol.* 219, 34-35. doi: 10.1016/j.jbiotec.2015.12.008
- Romero, R. M., Gkorezis, P., Kidd, S. P., Hamme, V. J., Weyens, N., Monterroso, C., and Vangronsveld J. (2017). Characterization and degradation potential of diesel-degrading bacterial strains for application in bioremediation. *Int. J. Phytoremediation.* 19, 955-963. doi: 10.1080/15226514.2017.1337065
- Sebaï, E. T., Lamrani, D. M., Changey, F., Rouard, N., and Laurent M. F. (2011). Evidence of atrazine mineralization in a soil from the Nile Delta: Isolation of *Arthrobacter* sp. TES6, an atrazine-degrading strain. *Int. Biodeterior. Biodegradation.* 65, 1249-1255. doi: 10.1016/j.ibiod.2011.05.011
- Strong, L. C., Rosendahl, C., Johnson, G., Sadowsky, M. J., and Wackett, L. P. (2002). *Arthrobacter aurescens* TC1 metabolizes diverse *s*-triazine ring compounds. *Appl. Environ. Microbiol.* 68, 5973-5980. doi: 10.1128/AEM.68.12.5973-5980.2002
- Vandera, E., Samiotaki, M., Parapouli, M., Panayotou, G., and Koukkou, I. A. (2015). Comparative proteomic analysis of *Arthrobacter phenanthrenivorans* Sphe3 on phenanthrene, phthalate and glucose. *J. Proteomics* 113, 73-89. doi: 10.1016/j.jpro.2014.08.018
- Wang, P., Qu, Y., and Zhou, J. (2009). Biodegradation of mixed phenolic compounds under high salt conditions and salinity fluctuations by *Arthrobacter* sp. W1. *Appl. Biochem. Biotechnol.* 159, 623-633. doi: 10.1007/s12010-008-8494-7
- Yang, M., Ma, P., Li, W., Liu, J., Li, L., Zhu, X., and Wang, X. (2007). 2, 3-Dihydroxybiphenyl dioxygenase gene was first discovered in *Arthrobacter* sp. strain PJ3. *Chinese Science Bulletin* 52, 1205-1211. doi: 10.1007/s11434-007-0191-3
- Yao, Y., Tang, H., Su, F., and Xu, P. (2015). Comparative genome analysis reveals the molecular basis of nicotine degradation and survival capacities of *Arthrobacter*. *Sci. Rep.* 5, 8642. doi: 10.1038/srep08642
