# Supplementary material for: Insight Into Metabolic Versatility of an Aromatic Compounds-Degrading Arthrobacter sp. YC-RL1
Source: Front Microbiol. 2018 Oct 11;9:2438. doi: 10.3389/fmicb.2018.02438 (PMC6193132; doi:10.3389/fmicb.2018.02438)
Supplement: Supplementary file 2 [file Table_1.XLSX]

## Sheet: Sheet1
Dataset S1 | Variety of genes involved in the transformation of aromatic compounds
KEGG pathway	Locus_tag*	KEGG number	Gene annotation
Chlorocyclohexane and chlorobenzene metabolism (ko00361)	ATC04_RS00485	K01061	carboxymethylenebutenolidase
	ATC04_RS02860	K03380	phenol 2-monooxygenase
	ATC04_RS11500	K00446	catechol 2,3-dioxygenase
	ATC04_RS12260	K03380	phenol 2-monooxygenase
Bisphenol degradation (ko00363)	ATC04_RS02145	K00517	oxidoreductases
	ATC04_RS04740	K00100	dehydrogenase
	ATC04_RS06715	K00100	dehydrogenase
	ATC04_RS12800	K00100	dehydrogenase
	ATC04_RS14590	K00517	oxidoreductases
	ATC04_RS16590	K00492	monooxygenase
Fluorobenzoate degradation (ko00364)	ATC04_RS00485	K01061	carboxymethylenebutenolidase
Dioxin degradation (ko00621)	ATC04_RS01545	K01666	4-hydroxy 2-oxovalerate aldolase
	ATC04_RS01550	K04073	acetaldehyde dehydrogenase
	ATC04_RS01555	K02554	2-keto-4-pentenoate hydratase
	ATC04_RS03580	K01617	2-oxo-3-hexenedioate decarboxylase
Xylene degradation (ko00622)	ATC04_RS01545	K01666	4-hydroxy 2-oxovalerate aldolase
	ATC04_RS01550	K04073	acetaldehyde dehydrogenase
	ATC04_RS01555	K02554	2-keto-4-pentenoate hydratase
	ATC04_RS03580	K01617	2-oxo-3-hexenedioate decarboxylase
	ATC04_RS11500	K00446	catechol 2,3-dioxygenase
Toluene degradation (ko00623)	ATC04_RS00485	K01061	carboxymethylenebutenolidase
	ATC04_RS02860	K03380	phenol 2-monooxygenase
	ATC04_RS12260	K03380	phenol 2-monooxygenase
	ATC04_RS16590	K00492	monooxygenase
Polycyclic aromatic hydrocarbon degradation (ko006240	ATC04_RS02145	K00517	oxidoreductases
	ATC04_RS14590	K00517	oxidoreductases
	ATC04_RS16100	K00449	protocatechuate 3,4-dioxygenase
	ATC04_RS16105	K00448	protocatechuate 3,4-dioxygenase
	ATC04_RS16590	K00492	monooxygenase
Chloroalkane and chloroalkene degradation (ko00625)	ATC04_RS00365	K00128	dehydrogenase
	ATC04_RS01675	K00148	formaldehyde dehydrogenase
	ATC04_RS02535	K00128	dehydrogenase
	ATC04_RS04740	K00100	dehydrogenase
	ATC04_RS06715	K00100	dehydrogenase
	ATC04_RS12800	K00100	dehydrogenase
	ATC04_RS14425	K00128	dehydrogenase
	ATC04_RS15135	K00128	dehydrogenase
	ATC04_RS17370	K13953	alcohol dehydrogenase
	ATC04_RS17375	K00128	dehydrogenase
Naphthalene degradation (ko00626)	ATC04_RS01415	K01041	CoA-transferase
	ATC04_RS01485	K01041	CoA-transferase
	ATC04_RS01490	K01041	CoA-transferase
	ATC04_RS12950	K00155	aldehyde dehydrogenase
	ATC04_RS16590	K00492	monooxygenase
	ATC04_RS17370	K13953	dehydrogenase
Aminobenzoate degradation (ko00627)	ATC04_RS00330	K01426	amidase
	ATC04_RS01445	K01692	enoyl-CoA hydratase
	ATC04_RS01495	K01692	enoyl-CoA hydratase
	ATC04_RS02145	K00517	oxidoreductases
	ATC04_RS02860	K03380	phenol 2-monooxygenase
	ATC04_RS03110	K01692	enoyl-CoA hydratase
	ATC04_RS04205	K01692	enoyl-CoA hydratase
	ATC04_RS05340	K00680	beta-ketoadipyl CoA thiolase
	ATC04_RS08620	K00680	beta-ketoadipyl CoA thiolase
	ATC04_RS12260	K03380	phenol 2-monooxygenase
	ATC04_RS14590	K00517	oxidoreductases
	ATC04_RS16590	K00492	monooxygenase
	ATC04_RS17115	K01692	enoyl-CoA hydratase
Ethylbenzene degradation (ko00642)	ATC04_RS05340	K00680	beta-ketoadipyl CoA thiolase
	ATC04_RS07730	K00632	acetyl-CoA acetyltransferase
	ATC04_RS08620	K00680	beta-ketoadipyl CoA thiolase
Styrene degradation (ko00643)	ATC04_RS00330	K01426	amidase
	ATC04_RS04575	K00146	aldehyde dehydrogenase
	ATC04_RS11500	K00446	catechol 2,3-dioxygenase
Nicotinate and nicotinamide metabolism (ko00760)	WP_047120595	K01239	hydrolase
	ATC04_RS07010	K03426	NADH pyrophosphatase
	ATC04_RS08680	K00969	nicotinate-nucleotide adenylyltransferase
	ATC04_RS11435	K00767	nicotinate-nucleotide pyrophosphorylase
	ATC04_RS11445	K03517	quinolinate synthetase
	ATC04_RS11700	K00763	nicotinate phosphoribosyltransferase
	ATC04_RS11705	K08281	nicotinamidase
	ATC04_RS12405	K00858	NAD kinase
	ATC04_RS12690	K03743	damage-inducible protein
	ATC04_RS13980	K03783	purine nucleoside phosphorylase
	ATC04_RS16085	K06989	dehydrogenase
* The Locus_tag represents the locus_tag in NCBI annotated files
